# Supplementary material for: Application of a Convolutional Neural Network for Multitask Learning to Simultaneously Predict Microvascular Invasion and Vessels that Encapsulate Tumor Clusters in Hepatocellular Carcinoma
Source: PubMed Central journal article supplement (PMC9492610; doi:10.1245/s10434-022-12000-6), 2022-06-26
Supplement: 10434_2022_12000_MOESM1_ESM.pdf [file 10434_2022_12000_MOESM1_ESM.pdf]

**Application of a Convolutional Neural Network for Multitask Learning to Simultaneously Predict Microvascular Invasion and Vessels that Encapsulate Tumor Clusters in Hepatocellular Carcinoma**

Tongjia Chu, MD<sup>1</sup>, Chen Zhao, MD<sup>2</sup>, Jian Zhang, MD, PhD<sup>1</sup>, Kehang Duan, MD<sup>1</sup>, Mingyang Li, MD<sup>3</sup>, Tianqi Zhang, MD<sup>3</sup>, Shengnan Lv, MD<sup>1</sup>, Huan Liu, MD, PhD<sup>1</sup>, Feng Wei, MD, PhD<sup>1\*</sup>

<sup>1</sup>Department of Hepatobiliary & Pancreatic Surgery, The First Hospital of Jilin University, Changchun, P.R. China;

<sup>2</sup>College of Computer Science and Technology, Jilin University, Changchun, P.R. China;

<sup>3</sup>Department of Radiology, The First Hospital of Jilin University, Changchun, P.R. China;

\*Correspondence: wei\_feng@jlu.edu.cn

**Running Head**

3D CNNs simultaneously predict MVI and VETC

**Conflicts of Interest:** The authors declare no conflict of interest.

**Funding:** This research is sponsored by grants from the National Natural Science Foundation of China (81972273), Jilin Provincial Medical Foundation (JLSWSRCZX2020-068), and Achievement Transformation Fund of the First Hospital of Jilin University (JDYYZH-2102035).

Supplementary Table 1. Parameters of three MRI scanners.

| <b>Parameter</b>          | <b>Discovery MR750 3.0 T</b> | <b>Ingenia 3.0 T</b> | <b>Achieva 3.0 T</b> |
|---------------------------|------------------------------|----------------------|----------------------|
| Echo time (TE) (ms)       | 1.67                         | 1.4                  | 1.43                 |
| Repetition time (TR) (ms) | 4.06                         | 3.3                  | 3.03                 |
| Field of view (FOV) (mm)  | 360×290                      | 400×304              | 375×298              |
| Slice thickness (mm)      | 4.4                          | 5                    | 6                    |
| Slice gap (mm)            | 2.2                          | 2.5                  | 3                    |
| Flip angle (degrees)      | 10                           | 10                   | 10                   |

Supplementary Table 2. Clinical characteristics of patients in training and validation cohorts. a. Microvascular invasion. b. Vessels that encapsulate tumor clusters.

a

| Characteristics                                  | Training           |                       | Pintra | Validation         |                      | Pintra | Pinter |
|--------------------------------------------------|--------------------|-----------------------|--------|--------------------|----------------------|--------|--------|
|                                                  | MVI-negative (58)  | MVI-positive (35)     |        | MVI-negative (24)  | MVI-positive (16)    |        |        |
| Age (y)*                                         | 56.14±10.349       | 54±9.762              | 0.393  | 58.33±8.442        | 56.56±7.545          | 0.502  | 0.371  |
| No. of male patients                             | 47(81.0)           | 31(88.6)              | 0.338  | 18(75.0)           | 15(93.8)             | 0.126  | 0.845  |
| No. of patients with hepatitis B virus infection | 43(74.1)           | 28(80.0)              | 0.519  | 20(83.3)           | 12(75.0)             | 0.519  | 0.644  |
| No. of patients with cirrhosis                   | 36(62.1)           | 21(60.0)              | 0.496  | 15(62.5)           | 9(56.3)              | 0.693  | 0.62   |
| Alanine aminotransaminase level (U/L)*           | 46.459±65.8186     | 49.603±48.8043        | 0.237  | 39.979±34.444      | 46.7±42.1645         | 0.74   | 0.833  |
| Aspartate aminotransaminase level (U/L)*         | 42.557±53.1813     | 45.171±36.5642        | 0.17   | 35.521±14.8335     | 56.438±50.3412       | 0.384  | 0.24   |
| γ-Glutamyltransferase (U/L)*                     | 58.621±53.2417     | 90.7±92.2167          | 0.102  | 94.004±114.0559    | 118.331±124.6307     | 0.307  | 0.104  |
| a-Fetoprotein level (ng/ml)*                     | 270.3878±472.22475 | 6480.2786±24874.19984 | 0.196  | 1715.5588±8179.638 | 1519.4375±4214.78432 | 0.09   | 0.105  |
| Alkaline phosphatase (U/L)*                      | 79.231±23.4234     | 112.806±126.097       | 0.237  | 84.279±28.564      | 117.35±75.0942       | 0.112  | 0.232  |
| Serum total bilirubin (μmol/L)*                  | 18.19±12.0034      | 17.026±7.4685         | 0.949  | 17.779±7.8638      | 19.7±7.8706          | 0.334  | 0.248  |
| Serum conjugated bilirubin (μmol/L) *            | 5.559±7.2872       | 4.791±2.528           | 0.975  | 5.3±2.6891         | 6.106±2.7153         | 0.194  | 0.054  |
| Serum unconjugated bilirubin (μmol/L)*           | 12.631±6.8458      | 12.243±5.4231         | 0.975  | 12.479±5.4227      | 13.594±5.4602        | 0.529  | 0.418  |

b

| Characteristics                                  | Training              |                       | Pintra | Validation         |                       | Pintra | Pinter |
|--------------------------------------------------|-----------------------|-----------------------|--------|--------------------|-----------------------|--------|--------|
|                                                  | VETC-negative (62)    | VETC-positive (31)    |        | VETC-negative (27) | VETC-positive (13)    |        |        |
| Age (y)*                                         | 56.29±10.73           | 53.42±8.663           | 0.289  | 58.44±8.64         | 55.92±6.626           | 0.488  | 0.371  |
| No. of male patients                             | 52(83.9)              | 26(83.9)              | 1      | 20(74.1)           | 13(100.0)             | 0.043  | 0.845  |
| No. of patients with hepatitis B virus infection | 46(74.2)              | 25(80.6)              | 0.49   | 22(81.5)           | 10(76.9)              | 0.736  | 0.644  |
| No. of patients with cirrhosis                   | 37(59.7)              | 20(64.5)              | 0.091  | 18(66.7)           | 6(46.2)               | 0.215  | 0.62   |
| Alanine aminotransaminase level (U/L)*           | 48.405±67.1146        | 46.116±42.1318        | 0.353  | 32.478±18.8306     | 63.831±55.1838        | 0.063  | 0.833  |
| Aspartate aminotransaminase level (U/L)*         | 45.763±55.9455        | 39.097±22.3407        | 0.328  | 33.219±12.6099     | 66.046±52.9808        | 0.035  | 0.24   |
| γ-Glutamyltransferase (U/L)*                     | 57.008±52.0595        | 98.065±95.3964        | 0.008  | 92.774±109.0831    | 126.5±134.9434        | 0.254  | 0.104  |
| a-Fetoprotein level (ng/ml)*                     | 2047.4026±13699.09686 | 3727.5252±18605.74808 | 0.067  | 168.66±627.94901   | 4686.9685±11605.63592 | 0.046  | 0.105  |
| Alkaline phosphatase (U/L)*                      | 82.45±28.9172         | 110.7±132.7896        | 0.522  | 95.026±54.2832     | 102.662±55.3227       | 0.444  | 0.232  |
| Serum total bilirubin (μmol/L)*                  | 18.316±11.458         | 16.623±8.3087         | 0.577  | 17.067±7.124       | 21.623±8.5888         | 0.097  | 0.248  |
| Serum conjugated bilirubin (μmol/L) *            | 5.631±7.0923          | 4.548±2.3419          | 0.714  | 5.152±2.4251       | 6.6±3.0529            | 0.149  | 0.054  |
| Serum unconjugated bilirubin (μmol/L)*           | 12.685±6.4053         | 12.084±6.2299         | 0.56   | 11.915±5.0628      | 15.023±5.6588         | 0.119  | 0.418  |
